# Supplementary material for: Fabrication, characterization and applications of graphene electronic tattoos
Source: Springer Nature journal article supplement (doi:10.1038/s41596-020-00489-8), 2021-04-12
Supplement: MOESM1 [file 41596_2020_489_MOESM1_ESM32.pdf]

---

## Supplementary information

---

# Fabrication, characterization and applications of graphene electronic tattoos

---

In the format provided by the  
authors and unedited

Supplementary Table 1. Comparative performance, fabrication scale, advantages and drawbacks of different electronic tattoos and epidermal sensors. Color code: green – good, yellow – acceptable, red – needs improvements.

|                                                       | Graphene Electronic Tattoos (This work)                            | PEDOT:PSS tattoos [1-2]                      | On-body inks [3]                                      | Gold tattoos [4]                                      | Gold microcrack tattoos [5]             | Unsupported gold tattoos [6]       | Epidermal sensors [7]                            | Ag/AgCl medical grade gel electrodes |
|-------------------------------------------------------|--------------------------------------------------------------------|----------------------------------------------|-------------------------------------------------------|-------------------------------------------------------|-----------------------------------------|------------------------------------|--------------------------------------------------|--------------------------------------|
| <b>Fabrication</b>                                    | Cheap, low-cost, scalable, low-end tools used                      | cheap, scalable, low-end tools               | cheap, scalable, requires advanced chemistry          | Cheap, low-cost, scalable, low-end tools used         | Complicated cleanroom based technology  | Cheap, low-cost, scalable          | Cleanroom, microfabrication                      | Market ready technology              |
| <b>Stand-alone or require support</b>                 | stand alone                                                        | requires support                             | requires support                                      | requires support                                      | stand alone                             | stand alone                        | Stand alone                                      | Self-adhesive                        |
| <b>Stretchability</b>                                 | superior, 40% stretchability                                       | good                                         | good, up to 20% stretchability                        | Superior, >45% stretchability                         | good, up to 20% stretchability          | Superior, up to 40% stretchability | mixed                                            | bad                                  |
| <b>Adhesion to skin</b>                               | Superior, self-adhesive                                            | good, but uses glue                          | good, but still uses acrylic tape for better adhesion | moderate, requires adhesive spray                     | Superior                                | Superior                           | moderate-poor, depending on overall thickness    | Superior (due to adhesive)           |
| <b>Transparency</b>                                   | yes, >85%                                                          | semi-transparent                             | no                                                    | no                                                    | no                                      | semi-transparency                  | depending on the constitution                    | no                                   |
| <b>Impedance to Skin (@10 kHz)</b>                    | 6-10 kOhm                                                          | ~5kOhm                                       | >30 kOhm*                                             | 5-10 kOhm                                             | N/A                                     | 3-4kOhm                            | N/A                                              | 1-2 kOhm                             |
| <b>Rs</b>                                             | 300-1000 Ohm/sq                                                    | 50-500 Ohm/sq                                | 1-10 Ohm/sq                                           | N/A                                                   | N/A                                     | N/A                                | N/A                                              | non conductive laterally             |
| <b>Harmful solvents (in direct contact with skin)</b> | no                                                                 | no                                           | yes                                                   | N/A                                                   | N/A                                     | no                                 | No                                               | N/A                                  |
| <b>Stability (storage)</b>                            | Superior, >1year storage (ambient)                                 | Great                                        | Great (>1 month)                                      | Great                                                 | N/A                                     | N/A                                | Superior, packaged device                        | <1 week when exposed to ambient      |
| <b>Thickness of active part</b>                       | 1 nm                                                               | 240-360 nm                                   | 1 - 20 $\mu$ m                                        | 110 nm                                                | 100-400 nm                              | 70-100 nm                          | ~mm                                              | 1-2 mm                               |
| <b>Thickness of supporting part</b>                   | 200 nm                                                             | 1.5 $\mu$ m                                  | N/A                                                   | 1.4 $\mu$ m                                           | no                                      | no                                 | ~mm                                              | 1-2 mm                               |
| <b>Associated costs, including equipment</b>          | 0.5\$/cm <sup>2</sup> for graphene supply. Only low cost equipment | Low. Highest-end equipment is inkjet printer | Low. Mostly chemicals and chemistry associated costs. | Low. Mostly chemicals and chemistry associated costs. | high, cleanroom-related equipment costs | N/A                                | High, electronic devices, fabrication, packaging | N/A                                  |
| <b>Skin Irritation</b>                                | no                                                                 | no                                           | no                                                    | no                                                    | N/A                                     | no                                 | No, even after 1 week                            | possible after long wear             |

Supplementary Table 2. Comparative graphene prices table, status at October 2020.

| Supplier                    | Region        | Price, \$/cm <sup>2</sup> | Link                                                                                                                                                                                                                                                          |
|-----------------------------|---------------|---------------------------|---------------------------------------------------------------------------------------------------------------------------------------------------------------------------------------------------------------------------------------------------------------|
| <i>Grolltex</i>             | North America | 0.95                      | <a href="https://grolltex.com/product/monolayer-graphene-on-copper-foil-6-x-6-150-mm-x-150-mm/">https://grolltex.com/product/monolayer-graphene-on-copper-foil-6-x-6-150-mm-x-150-mm/</a>                                                                     |
| <i>ACS Materials</i>        | North America | 3.23                      | <a href="https://www.acsmaterial.com/graphene-on-copper-foil.html">https://www.acsmaterial.com/graphene-on-copper-foil.html</a>                                                                                                                               |
| <i>Graphene Supermarket</i> | North America | 4.36                      | <a href="https://graphene-supermarket.com/Single-Layer-Graphene-on-Copper-foil-4-x4-CVD-Cu.html">https://graphene-supermarket.com/Single-Layer-Graphene-on-Copper-foil-4-x4-CVD-Cu.html</a>                                                                   |
| <i>2D Semiconductors</i>    | North America | 12.01                     | <a href="https://www.2dsemiconductors.com/graphene-on-cu-foils/">https://www.2dsemiconductors.com/graphene-on-cu-foils/</a>                                                                                                                                   |
| <i>Graphenea</i>            | Europe        | 7.17                      | <a href="https://www.graphenea.com/collections/buy-graphene-films/products/monolayer-graphene-on-cu-4-inches?variant=51671644051">https://www.graphenea.com/collections/buy-graphene-films/products/monolayer-graphene-on-cu-4-inches?variant=51671644051</a> |
| <i>cqmx.com</i>             | Asia          | 0.53                      | <a href="http://www.cqmx.com/product/detail-80.html">http://www.cqmx.com/product/detail-80.html</a>                                                                                                                                                           |

## References

1. Ferrari, L. M., Ismailov, U., Badier, J.-M., Greco, F. & Ismailova, E. Conducting polymer tattoo electrodes in clinical electro- and magneto-encephalography. *npj Flex. Electron.* **4**, 1–9 (2020).
2. Ferrari, L. M. *et al.* Ultraconformable Temporary Tattoo Electrodes for Electrophysiology. *Adv. Sci.* **5**, 1700771 (2018).
3. Ershad, F. *et al.* Ultra-conformal drawn-on-skin electronics for multifunctional motion artifact-free sensing and point-of-care treatment. *Nat. Commun.* **11**, 3823 (2020).
4. Wang, Y. *et al.* Low-cost,  $\mu\text{m}$ -thick, tape-free electronic tattoo sensors with minimized motion and sweat artifacts. *npj Flex. Electron.* **2**, 6 (2018).
5. Gong, S. *et al.* Local Crack-Programmed Gold Nanowire Electronic Skin Tattoos for In-Plane Multisensor Integration. *Adv. Mater.* **31**, 1–8 (2019).
6. Miyamoto, A. *et al.* Inflammation-free, gas-permeable, lightweight, stretchable on-skin electronics with nanomeshes. *Nat. Nanotechnol.* **12**, 907–913 (2017).
7. Krishnan, S. R. *et al.* Wireless, Battery-Free Epidermal Electronics for Continuous, Quantitative, Multimodal Thermal Characterization of Skin. *Small* **14**, 1803192 (2018).
